# Supplementary material
Source: PubMed Central journal article supplement (PMC4121046)
Supplement: Supp_Figure1.pdf [file Supp_Figure1.pdf]

## Supplementary Data

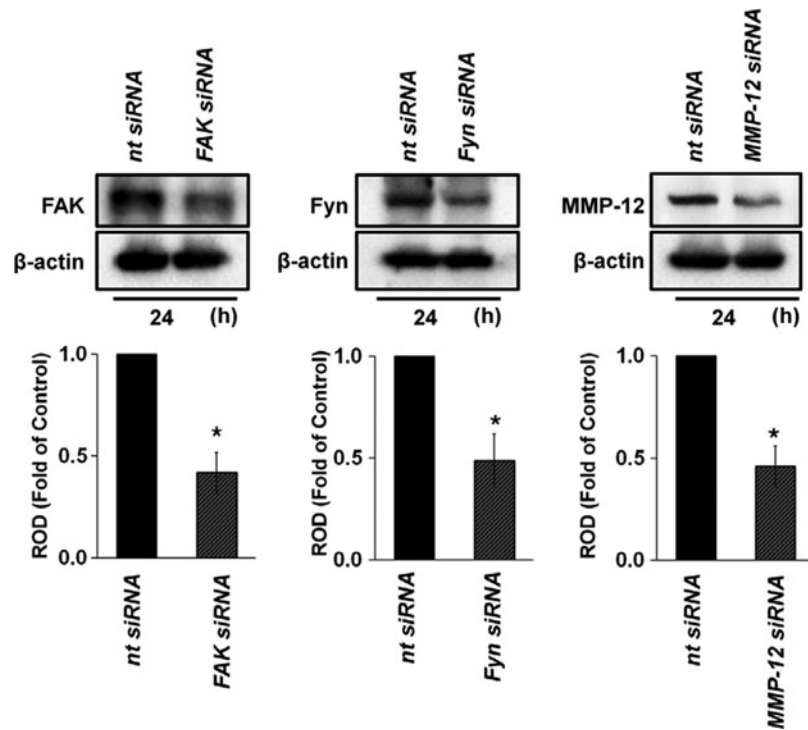

**SUPPLEMENTARY FIG. S1.** Effect of siRNA on target proteins. Cells were transfected for 24 h with *FAK*, *Fyn*, *MMP-12* (200 pM), or nontargeting (*nt*) siRNA (200 pM) using Hyperfectamine. FAK, Fyn, and MMP-12 expression was analyzed using western blot. Error bars represent mean  $\pm$  SE from three independent experiments. \* $P < 0.05$  versus *nt* siRNA. FAK, focal adhesion kinase; MMP, matrix metalloproteinase; SE, standard errors; siRNA, small interfering RNA.
