# Supplementary material
Source: PubMed Central journal article supplement (PMC4121046)
Supplement: Supp_Figure2.pdf [file Supp_Figure2.pdf]

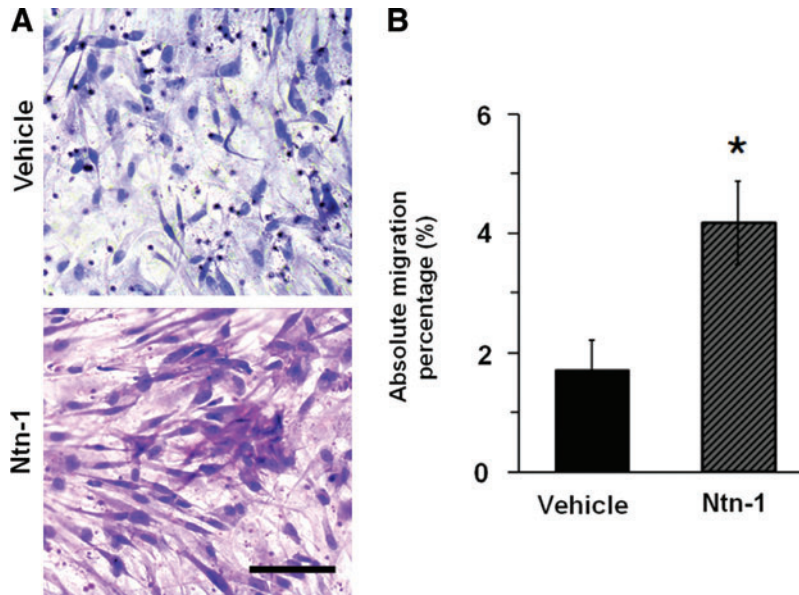

**SUPPLEMENTARY FIG. S2.** Effects of Ntn-1 on migration of human UCB-MSCs. (A) The migration capacity of UCB-MSCs treated with Ntn-1 (50 ng/mL) was assessed in transwell permeable support with 8.0- $\mu$ m pore size membrane. Cells were removed from the upper chamber with a cotton swab, and the cells that migrated to the lower surface of the membrane were stained with hematoxylin and eosin. Scale bars, 100  $\mu$ m. Representative figures from three independent experiments are shown. (B) Quantification of the absolute migration percentage based on the results of transwell migration assay. The number of migrated cells at the lower side per initial UCB-MSCs suspensions ( $5 \times 10^4$  cells) was calculated and converted the number to a percentage by multiplying by 100. Data are represented as mean  $\pm$  SE, \* $P < 0.05$  versus vehicle. Ntn-1, Netrin-1; UCB-MSCs, umbilical cord blood-derived mesenchymal stem cells.
