# Supplementary material
Source: PubMed Central journal article supplement (PMC4121046)
Supplement: Supp_Figure3.pdf [file Supp_Figure3.pdf]

AD-MSCs

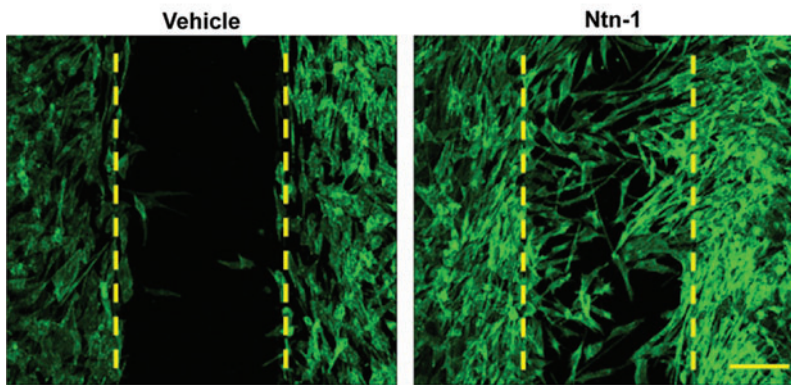

**SUPPLEMENTARY FIG. S3.** Effect of Ntn-1 on motility of human adipose-derived mesenchymal stem cells (AD-MSCs). AD-MSCs treated with Ntn-1 (50 ng/mL) for 24 h were fixed and labeled with phalloidin-AlexaFluor 488 (*green*) to identify the migrating cells.  $n=3$ . Scale bars represent 100  $\mu\text{m}$  (magnification,  $\times 100$ ).
