# Supplementary material
Source: PubMed Central journal article supplement (PMC4121046)
Supplement: Supp_Figure4.pdf [file Supp_Figure4.pdf]

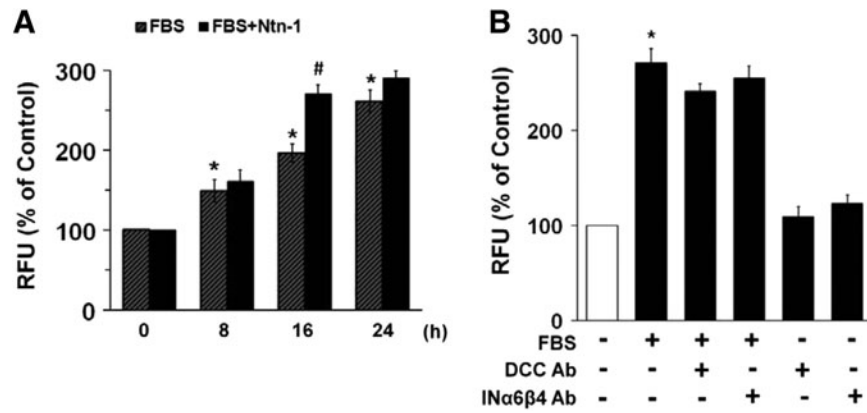

**SUPPLEMENTARY FIG. S4.** Ntn-1 has enhancing effect on FBS-induced migration. **(A)** Time response of FBS in Oris™ cell migration assay. Cells were treated with either 1% FBS or 1% FBS + 50 ng/mL Ntn-1 for various times (0–24 h). Fluorescence in the analytical zone was quantified with a plate reader. Data represent mean ± SE of four independent experiments with triplicate dishes. \* $P < 0.05$  versus 0 h. # $P < 0.01$  versus FBS alone at each time point. **(B)** Cells were pretreated with DCC-blocking antibody (2.5 μL/mL) or combination of INα6 and INβ4-blocking antibodies (2.5 μL/mL) for 30 min prior to FBS exposure for 24 h. Oris™ cell migration assay was performed and quantified the value of fluorescence. Data represent mean ± SE of four independent experiments with triplicate dishes. \* $P < 0.01$  versus vehicle. DCC, deleted in colorectal cancer; FBS, fetal bovine serum.
