# Supplementary material
Source: PubMed Central journal article supplement (PMC4121046)
Supplement: Supp_Figure5.pdf [file Supp_Figure5.pdf]

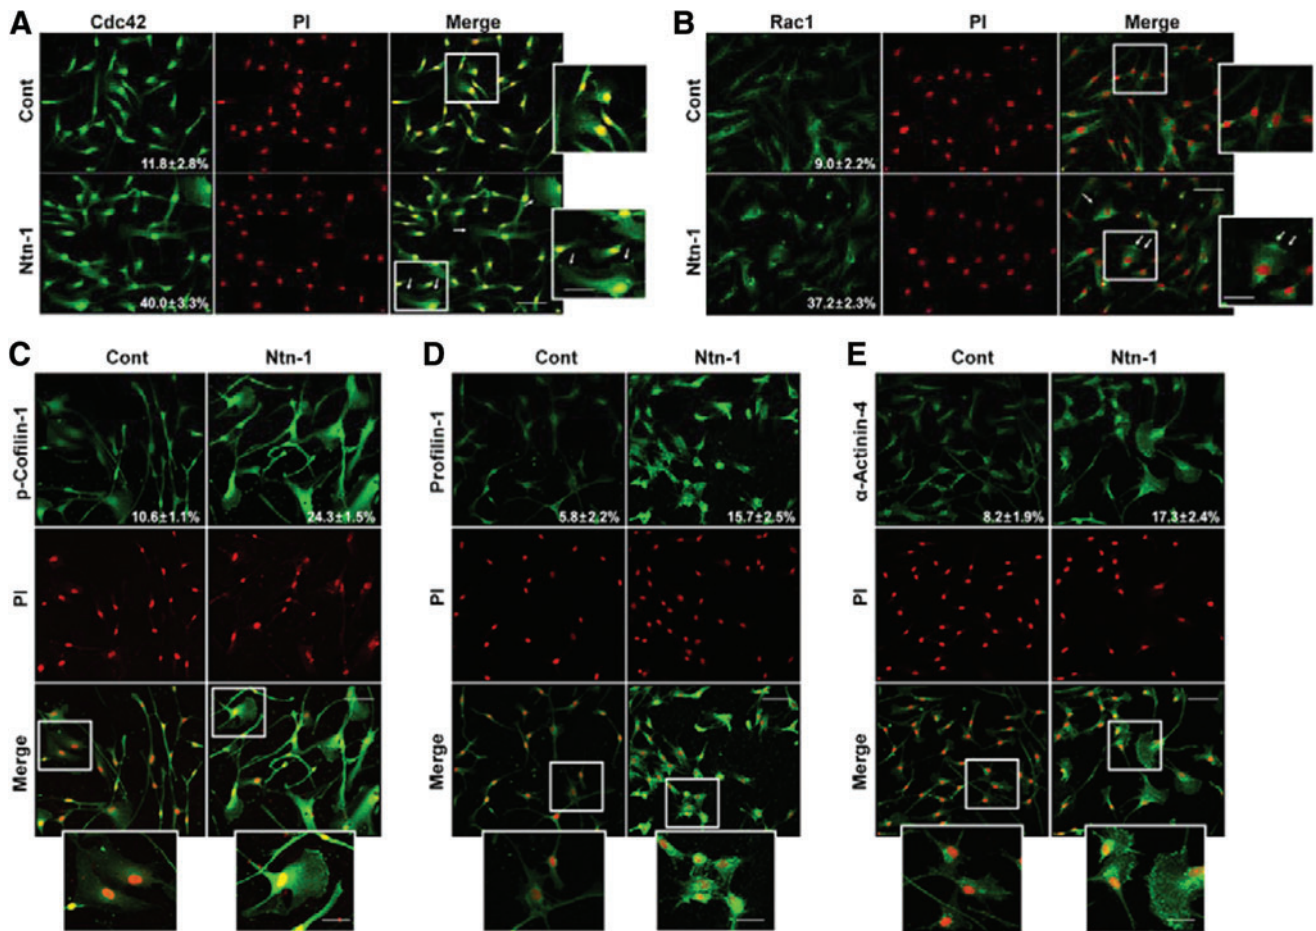

**SUPPLEMENTARY FIG. S5.** Ntn-1 regulates cytoskeletal reorganization-related proteins. UCB-MSCs were treated with Ntn-1 (50 ng/mL) for 24 h. (A, B) Cdc42 (green) and Rac1 (green) were detected by immunofluorescence staining method, and the cell numbers showing the membrane translocation of Cdc42 and Rac1 were directly counted per random microscopic field and converted the numbers to a percentage by multiplying by 100. Ten random fields per coverslip were counted. Arrows indicate expression of Cdc42 or Rac1 at membrane of lamellipodia. (C–E) The increased expressions of p-Cofilin-1 (green), Profilin-1 (green), and α-Actinin-4 (green) were quantified by using Image J program. The quantification data of immunofluorescence images were presented as mean ± SE of three independent experiment. Scale bars represent 100 μm (magnification, ×400). PI was used for nuclear counterstaining (red). PI, propidium iodide.
