# Supplementary material
Source: PubMed Central journal article supplement (PMC4121046)
Supplement: Supp_Figure6.pdf [file Supp_Figure6.pdf]

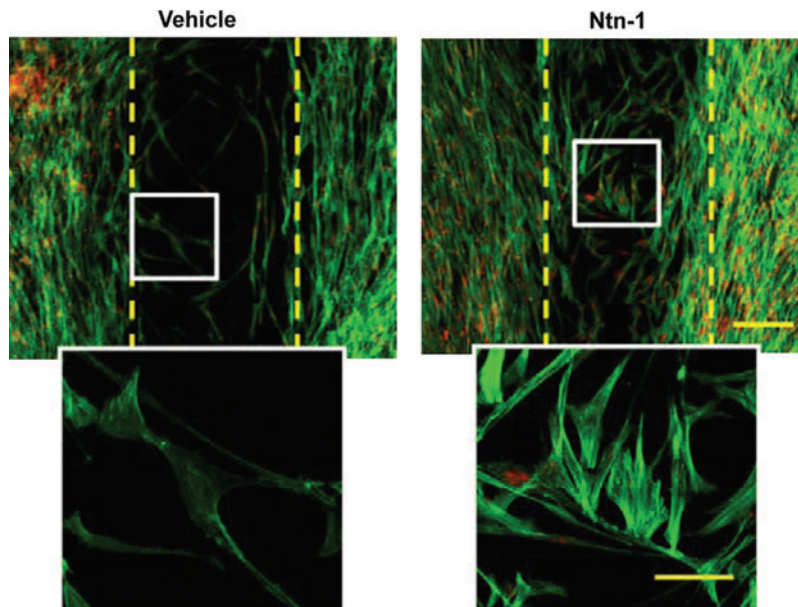

**SUPPLEMENTARY FIG. S6.** Ntn-1 induces actin filament organization during directional cell migration. UCB-MSCs were cultured in 35-mm dishes with both silicone reservoirs, which are separated by a 500- $\mu$ m thick wall (Ibidi, Martinsried, Germany). When the cell reached around 100% confluence, the silicone reservoirs were removed to create a wound field. The cells were treated with Ntn-1 (50 ng/mL) for 24 and the migrated cells were confirmed by staining filamentous (F)-actin with Alexa Fluor<sup>®</sup> 488-conjugated phalloidin at low and high magnification. Scale bars at low magnification represent 200  $\mu$ m (magnification,  $\times 100$ ). Scale bars at high magnification represent 100  $\mu$ m (magnification,  $\times 400$ ).  $n = 5$ .
