# Supplementary material
Source: PubMed Central journal article supplement (PMC4121046)
Supplement: Supp_Table1.pdf [file Supp_Table1.pdf]

SUPPLEMENTARY TABLE S1. PRIMERS USED FOR POLYMERASE CHAIN REACTION

| <i>Gene</i>    | <i>Identification</i> | <i>Primer sequence, 5'-3'</i> | <i>Annealing temperature (°C)</i> | <i>Size (bp)</i> |
|----------------|-----------------------|-------------------------------|-----------------------------------|------------------|
| <i>MMP-1</i>   | Sense                 | AGCTAGCTCAGGATGACATTGATG      | 62                                | 74               |
|                | Antisense             | GCCGATGGGCTGGACAG             |                                   |                  |
| <i>MMP-2</i>   | Sense                 | GGCTGGTCAGTGGCTTGGGGTA        | 55                                | 225              |
|                | Antisense             | AGATCTTCTTCTTCAAGGACCGTT      |                                   |                  |
| <i>MMP-3</i>   | Sense                 | GATCTCTTCATTTTGGCCATCTCTTC    | 58                                | 246              |
|                | Antisense             | CTCCAGTATTTGTCCTCTACAAAGAA    |                                   |                  |
| <i>MMP-7</i>   | Sense                 | GAGATGCTCACTTCGATGAGG         | 53                                | 121              |
|                | Antisense             | GGATCAGAGGAATGTCCCATAC        |                                   |                  |
| <i>MMP-8</i>   | Sense                 | GGACCCAATGGAATCCTTGC          | 55                                | 204              |
|                | Antisense             | CCTGAAAGCATAGTTGGGATACAT      |                                   |                  |
| <i>MMP-9</i>   | Sense                 | GCGGAGATTGGGAACCAGCTGTA       | 57                                | 209              |
|                | Antisense             | GACGCGCTGTGTACACCCACA         |                                   |                  |
| <i>MMP-10</i>  | Sense                 | GGACCTGGGCTTTATGGAGATAT       | 55                                | 113              |
|                | Antisense             | CCCAGGGAGTGGCCAAGT            |                                   |                  |
| <i>MMP-11</i>  | Sense                 | ATTTGGTTCTTCCAAGGTGCTCAGT     | 59                                | 155              |
|                | Antisense             | CCTCGGAAGAAGTAGATCTTGTTCT     |                                   |                  |
| <i>MMP-12</i>  | Sense                 | GATGCACGCACCTCGATGT           | 56                                | 63               |
|                | Antisense             | GGCCCCCTGGCATT                |                                   |                  |
| <i>MMP-13</i>  | Sense                 | TTGTTGCTGCGCATGAGTTCG         | 52                                | 370              |
|                | Antisense             | GGGTGCTCATATGCAGCATCA         |                                   |                  |
| <i>MMP-14</i>  | Sense                 | TCAAGGAGCGCTGGTTCTG           | 63                                | 178              |
|                | Antisense             | AGGGACGCCTCATCAAACAC          |                                   |                  |
| <i>MMP-15</i>  | Sense                 | GGAATTTGCCGAGGCGACCTAGG       | 55                                | 315              |
|                | Antisense             | CATGGACCTCCGCGTCTTCG          |                                   |                  |
| <i>MMP-16</i>  | Sense                 | TGTACCTGACCAGACAAGAG          | 58                                | 384              |
|                | Antisense             | AGTGTCCATGGCTCATCTGA          |                                   |                  |
| <i>MMP-17</i>  | Sense                 | GACCTGTTTGCAGTGGCTGT          | 61                                | 473              |
|                | Antisense             | ACGATCTTGTGGTCGCTGGT          |                                   |                  |
| <i>MMP-19</i>  | Sense                 | CAGGCTCTCTATGGCAAGAA          | 54                                | 397              |
|                | Antisense             | GAGCTGCATCCAGGTTAGGT          |                                   |                  |
| <i>MMP-26</i>  | Sense                 | ACTTGTGGAAATCCTGGAGTTGTC      | 63                                | 111              |
|                | Antisense             | CAAAGAATGCCCAATCTCATGA        |                                   |                  |
| <i>β-Actin</i> | Sense                 | AACCGCGAGAAGATGACC            | 55                                | 351              |
|                | Antisense             | AGCAGCCGTGGCCATCTC            |                                   |                  |
