# Supplementary material
Source: PubMed Central journal article supplement (PMC4121046)
Supplement: Supp_Table2.pdf [file Supp_Table2.pdf]

SUPPLEMENTARY TABLE S2. SMALL INTERFERING RNA SEQUENCE FOR TRANSFECTION

| <i>Gene</i>   | <i>Identification</i> | <i>Sequence, 5'-3'</i> |
|---------------|-----------------------|------------------------|
| <i>FAK</i>    | Sense                 | GCGAUUAUAUGUUAGAGAU    |
|               | Antisense             | GGGCAUCAUUCAGAAGAU     |
|               | Sense                 | UAGUACAGCUCUUGCAU      |
|               | Antisense             | GGACAUUAUUGGCCACUGU    |
| <i>Fyn</i>    | Sense                 | CGGAUUGGCCCGAUUGAU     |
|               | Antisense             | GGACUCAUAUGCAAGAUUG    |
|               | Sense                 | GAAGCCCGCUCCUUGACAA    |
|               | Antisense             | GGAGAGACAGGUUACAUUC    |
| <i>MMP-12</i> | Sense                 | CCCGAUGUCCAUCAUUUCATT  |
|               | Antisense             | UGAAAUGAUGGACAUCGGGTT  |
|               | Sense                 | GCCUUGAGAUAAACAAACUTT  |
|               | Antisense             | AGUUUGUUUAUCUCAAGGCTT  |
|               | Sense                 | GAGCCAAAUAUCCCAAGATT   |
|               | Antisense             | UCUUGGGAUAAUUUGGCUCTT  |
|               | Sense                 | GGCCAUUCUAGUGAUCCAATT  |
|               | Antisense             | UUGGAUCACUAGAAUGGCCTT  |
| <i>Nt</i>     | Sense                 | UAGCGACUAAACACAUCAA    |
|               | Antisense             | UUGAUGUGUUUAGUCGCUA    |
